# Supplementary material for: Historical Review and Update of Surgical Treatment for Corneal Endothelial Diseases
Source: PubMed Central journal article supplement — Ophthalmol Ther. 2014 Feb 18;3(1-2):1–15. doi: 10.1007/s40123-014-0022-y (PMC4254859; doi:10.1007/s40123-014-0022-y), 2014-02-18
Supplement: 40123_2014_22_MOESM1_ESM.pdf [file 40123_2014_22_MOESM1_ESM.pdf]

- Fuchs' endothelial corneal dystrophy (FECD) manifests as bilateral, albeit asymmetric, central corneal guttae, corneal edema, and reduced vision.
- The course of this dystrophy can be further accelerated after intraocular surgery, specifically cataract extraction.
- Pseudophakic bullous keratopathy (PBK) is endothelial cell loss caused by surgery in the anterior chamber. If the corneal endothelium is damaged during surgery the same spectrum of symptoms as found in FECD can develop.
- Recently, some eye banks have experimented with the preparation of Descemet's membrane endothelial keratoplasty (DMEK)/Descemet's membrane automated endothelial keratoplasty donor tissue that may help the surgeon avoid the risk of tissue loss during the stromal separation step.
- The authors describe a new bimanual technique for insertion and positioning of endothelium-Descemet membrane grafts in DMEK after an historical review of all different approaches.

This summary slide represents the opinions of the authors. For a full list of acknowledgments and conflicts of interest for all authors of this article, please see the full text online. Copyright © The Authors 2014. Creative Commons Attribution Noncommercial License (CC BY-NC).
